# Supplementary material for: Liquid biopsy in non-small cell lung cancer—current status and future outlook—a narrative review
Source: PubMed Central journal article supplement — Transl Lung Cancer Res. 2021 May;10(5):2237–51. doi: 10.21037/tlcr-21-3 (PMC8182706; doi:10.21037/tlcr-21-3), 2021-05
Supplement: tlcr-10-05-2237-rc.pdf [file tlcr-10-05-2237-rc.pdf]

## Narrative Review Checklist

| Section/Topic             | Item No | Item                                                                                                                                                                                                                                                                                 | Reported on Page Number/Line Number               | Reported on Section/Paragraph     |
|---------------------------|---------|--------------------------------------------------------------------------------------------------------------------------------------------------------------------------------------------------------------------------------------------------------------------------------------|---------------------------------------------------|-----------------------------------|
| <b>TITLE</b>              |         |                                                                                                                                                                                                                                                                                      |                                                   |                                   |
| Title                     | 1       | Identify the report as a Narrative Review of Liquid biopsy in non-small cell lung cancer - current status and future outlook.                                                                                                                                                        | Page 1 / Line 1                                   | Title                             |
| <b>ABSTRACT</b>           |         |                                                                                                                                                                                                                                                                                      |                                                   |                                   |
| Unstructured summary      | 2       | Provide an unstructured summary including, as applicable: background, objective, brief summary of narrative review and implications for future research, and clinical practice or policy development.                                                                                | Pages 3-4 / Lines 58-75                           | Abstract                          |
| <b>INTRODUCTION</b>       |         |                                                                                                                                                                                                                                                                                      |                                                   |                                   |
| Rationale/background      | 3       | Describe the rationale for the review in the context of what is already known.                                                                                                                                                                                                       | Page 4 / Lines 80-87                              | Background/P1                     |
| Objectives                | 4       | Specify the key question(s) identified for the review topic.                                                                                                                                                                                                                         | Pages 6-7 / Lines 134-154; Page 8 / Lines 171-172 | Background/P5-6;<br>Background/P9 |
| <b>METHODS</b>            |         |                                                                                                                                                                                                                                                                                      |                                                   |                                   |
| Research selection        | 5       | Specify the process for identifying the literature search (eg, years considered, language, publication status, study design, and databases of coverage).                                                                                                                             | Page 8 / Lines 175-180                            | Methods/P1                        |
| <b>DISCUSSION/SUMMARY</b> |         |                                                                                                                                                                                                                                                                                      |                                                   |                                   |
| Narrative                 | 6       | Discuss: 1) research reviewed including fundamental or key findings, 2) limitations and/or quality of research reviewed, and 3) need for future research.                                                                                                                            | Pages 9-26 / Lines 183-571                        | Results                           |
| Summary                   | 7       | Provide an overall interpretation of the narrative review in the context of clinical practice and/or the Nutrition Care Process for registered dietitian nutritionists, clinical practice for other health professionals, policy development and implementation, or future research. | Pages 27-28 / Lines 578-589                       | Conclusion                        |

Article information: <http://dx.doi.org/10.21037/tlcr-21-3>.

\*As the checklist was provided upon initial submission, the page number/line number reported may be changed due to copyediting and may not be referable in the published version. In this case, the section/paragraph may be used as an alternative reference.
